# Supplementary material
Source: PubMed Central journal article supplement (PMC3402799)
Supplement: supp_47.1.20_Flynn_ODS.pdf [file supp_47.1.20_Flynn_ODS.pdf]

**Connectivity Map analysis of NMD+ *BMP2* related HPAH provides insights into disease penetrance**

Charles Flynn, Siyuan Zheng, Ling Yan, Lora Hedges, Bethany Womack, Josh Fessel, Joy Cogan, Eric Austin, James Loyd, James West, Zhongming Zhao, and Rizwan Hamid

**ONLINE DATA SUPPLEMENT**

**Supplementary figure 1:** Real time PCR analysis of total *BMP2* mRNA expression in the 20 samples analyzed in the array study. Data presented in an aggregate fashion for each group. Real-time PCR analysis was carried out using Taqman Universal Master Mix and a 7500 Real-Time PCR system according to the manufacturer's instructions (Applied Biosystems, Foster City, CA, USA).<sup>[11]</sup> *HPRT* was used as the endogenous housekeeping control. The error bars represent SEM. P values were two tailed and were calculated using students t test. Statistical analysis was done using the Prism V software package for Mac.

**Supplementary figure 2:** Real time PCR validation of the expression signature. Data are presented in aggregate fashion. The analysis was done as previously reported using Taqman predesigned assays<sup>[11]</sup> (Applied Biosystems, Foster City, CA). Error bars represent SEM. *HPRT* was used as the endogenous housekeeping control.

**Supplementary figure 3:** False positive and false negative curves with the varying size of the gene signature. The point (n=35) was selected where both false positive and false negative determinations reach their lowest point.

**Supplementary figure 4:** ROS measurement using the ROS-sensitive dye DCFDA. Aggregate data from CLs derived from 5 affected and 5 carrier individuals is presented. Each individual sample was measured in replicates of 8. The experiment was repeated 3 times. Results of one representative experiment are shown. The error bars represent

SEM. P values were two tailed and were calculated using students t test. Statistical analysis was done using the Prism V software package for Mac.

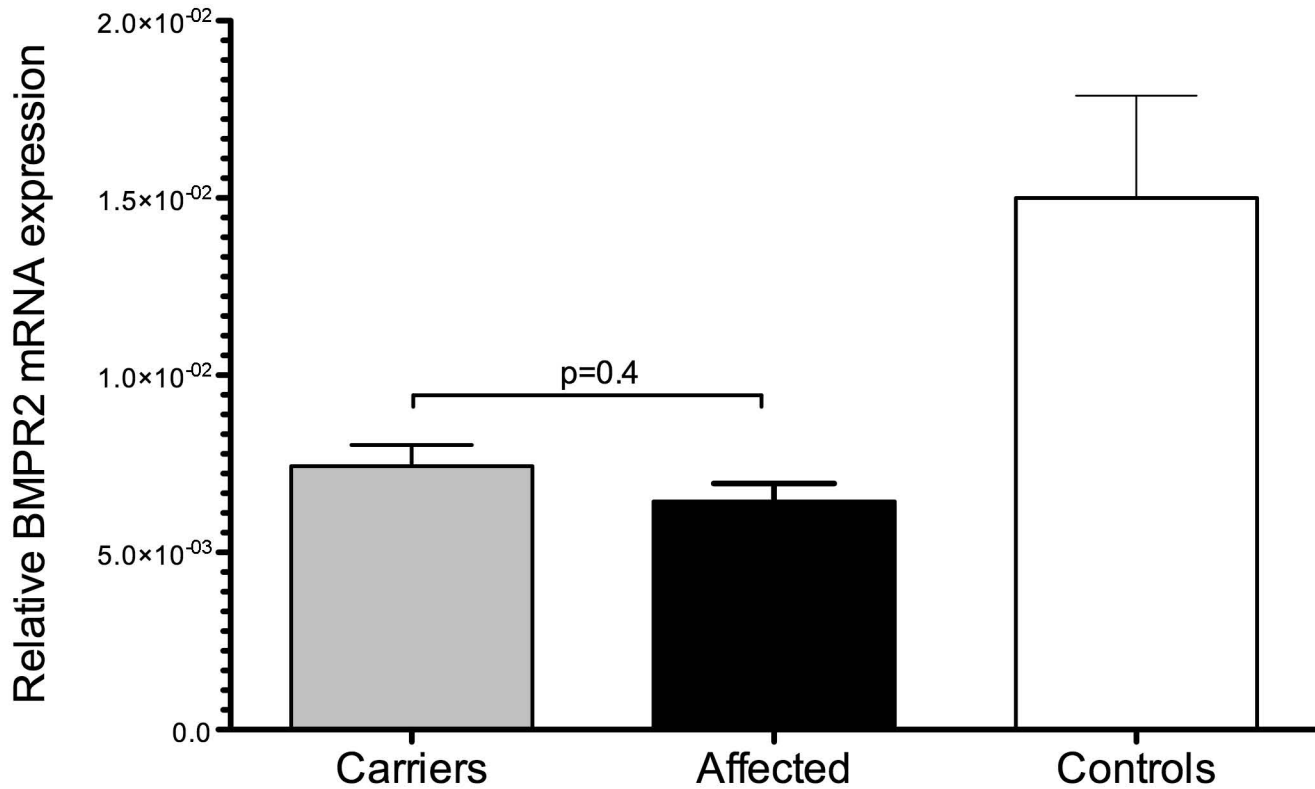

ASB2

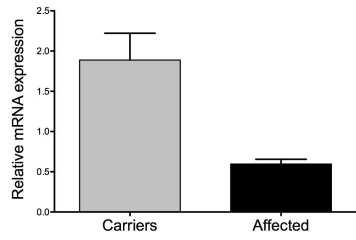

DPPA3

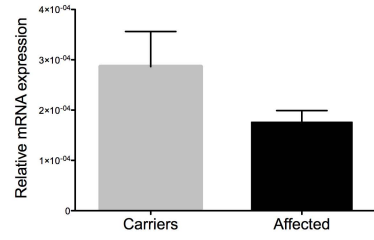

KCNJ15

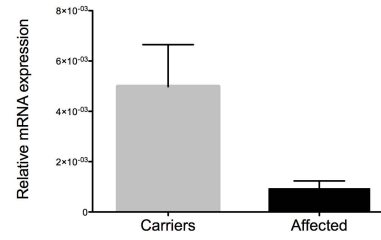

GPC5C

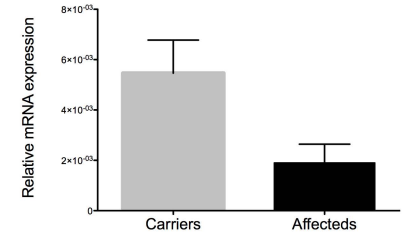

NAGK

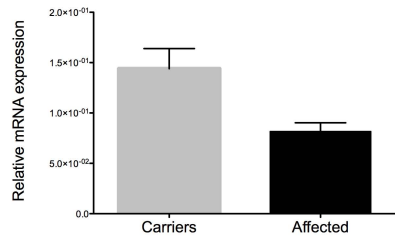

GPR176

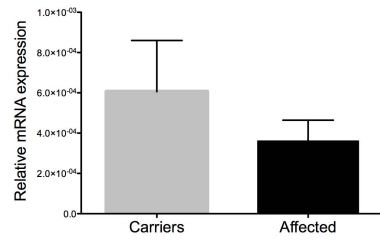

SSTR3

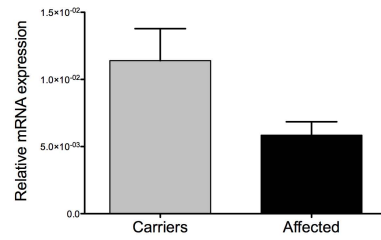

C6orf14

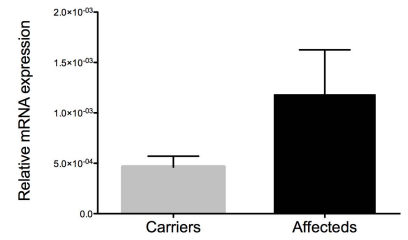

IL20

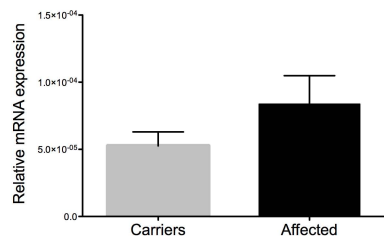

GABRR2

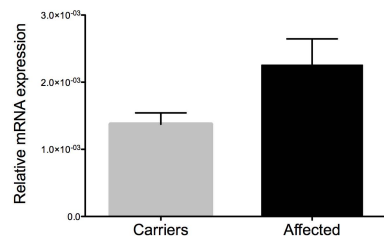

BMP8b

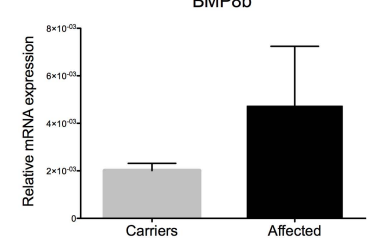

LASS2

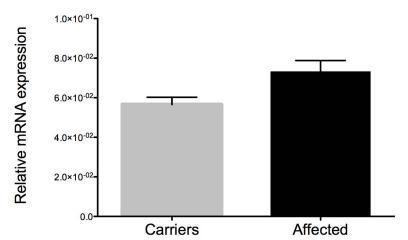

Supplementary Figure 2

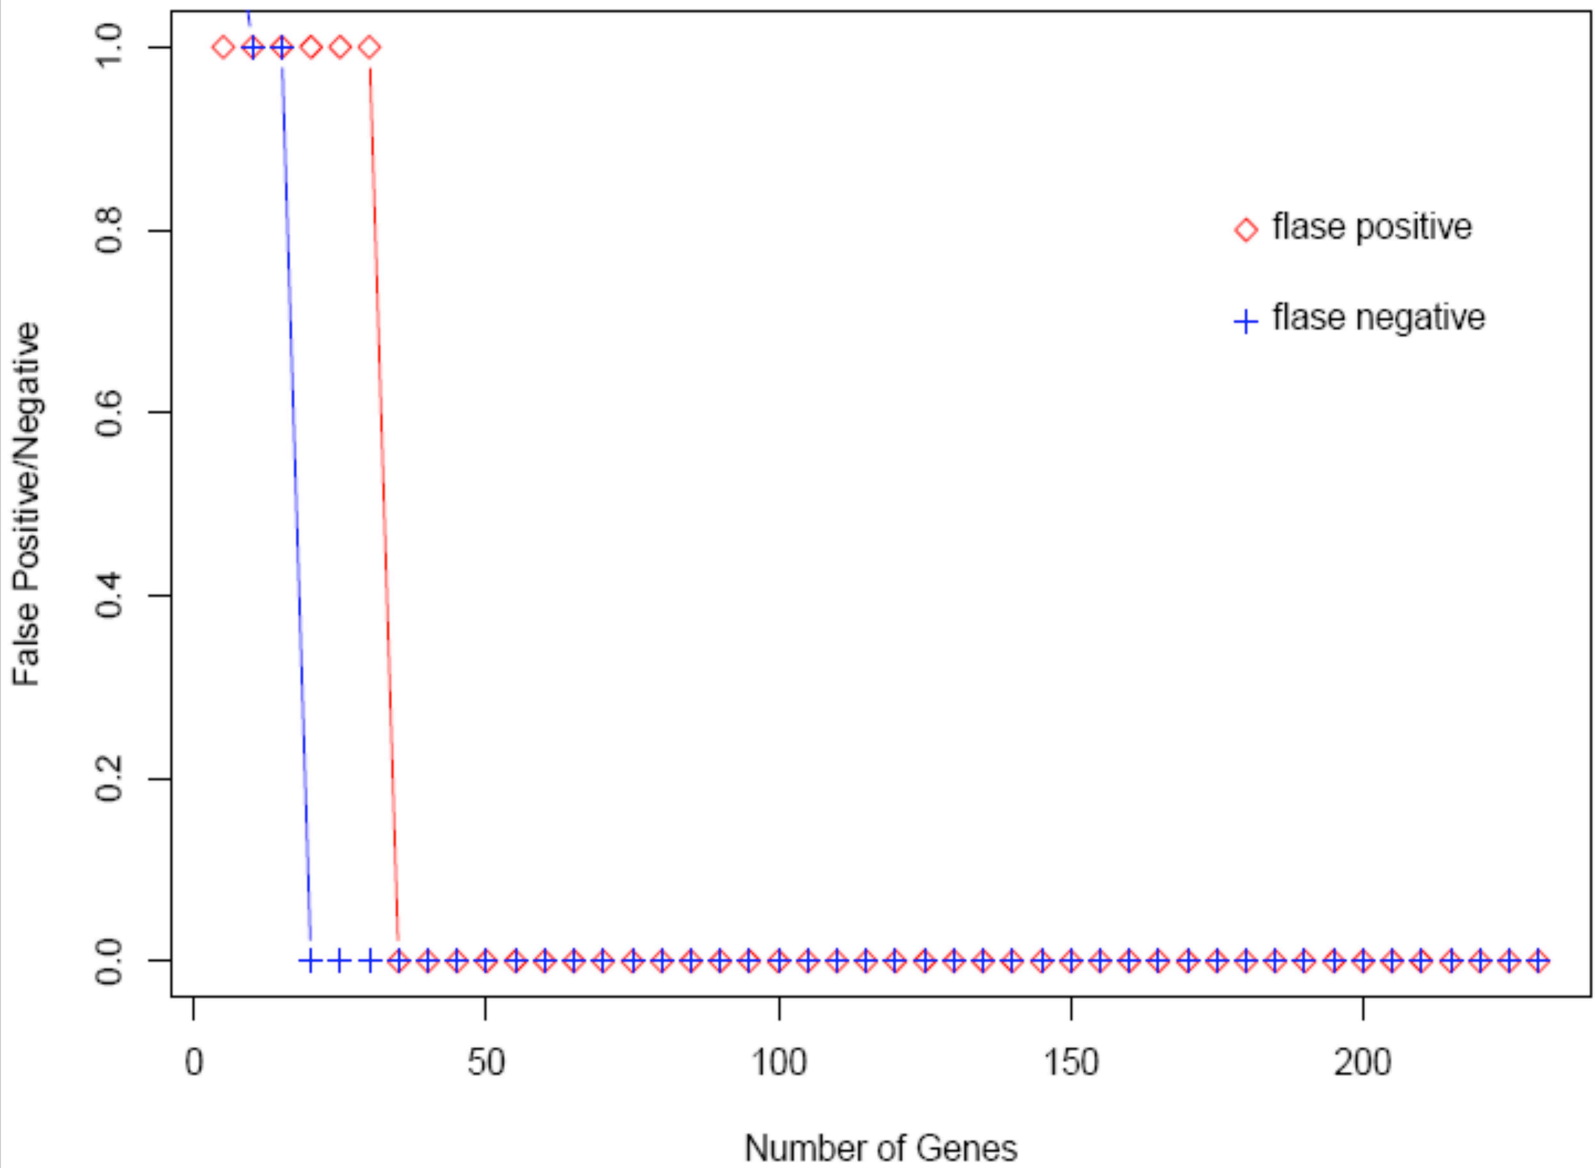

Supplementary Figure 3

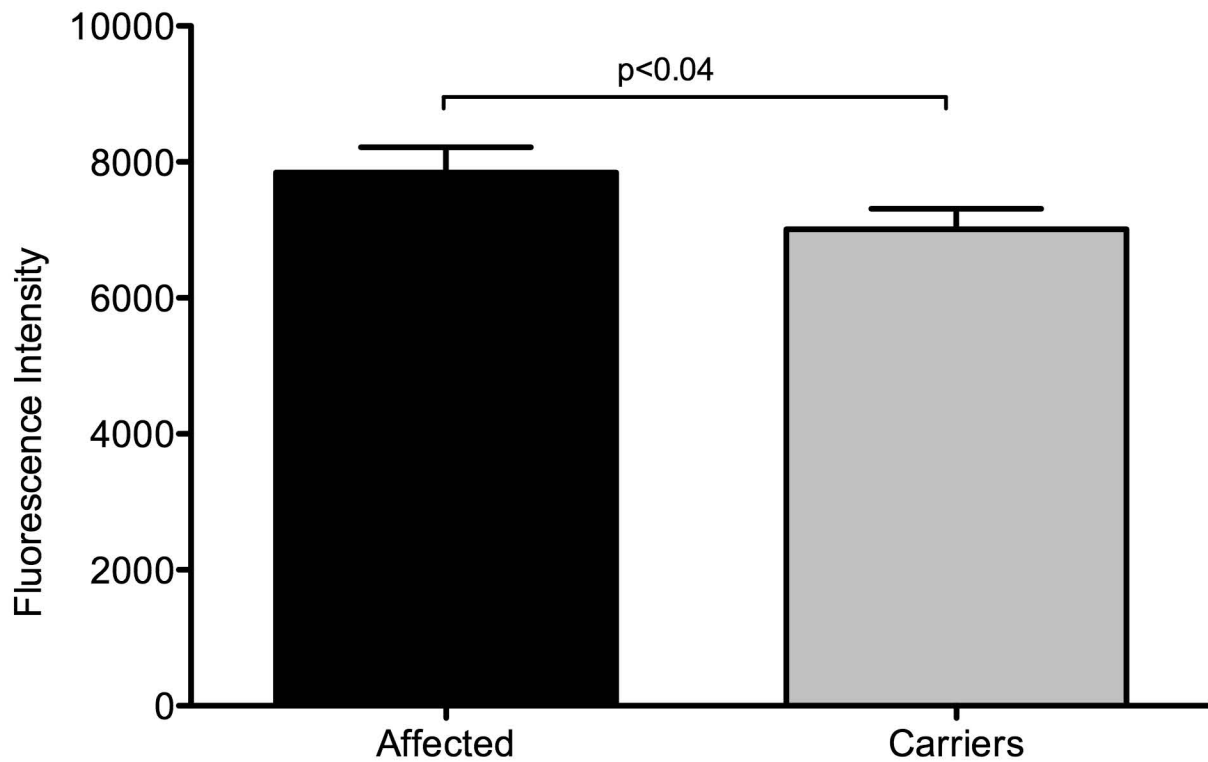

**Supplementary figure 4**
